# Supplementary material for: Resistance To Gastrocolonialism: Resilience And Culinary Innovation Among Multiethnic Communities In Indonesian School Canteens
Source: Research Square preprint supplement (doi:10.21203/rs.3.rs-8705737/v1), 2026-02-04
Supplement: Supplementary file 1 [file aa15c5c2c8a82c8e949f9c6c.docx]

Emi Tipuk Lestari

Faculty of Teacher Training and Education,

Universitas PGRI Yogyakarta, Bantul 55182,

Special Region of Yogyakarta, Indonesia

Email: tipoeklestari@upy.ac.id

27 01 2026

Editor-in-Chief

Matthias Kaiser

Food Ethics

Center for the Study of the Sciences and the Humanities

University of Bergen,

Bergen, Norway

Dear Professor Matthias Kaiser

I am pleased to submit our manuscript entitled “**Gastrocolonialism and the Hidden Curriculum: Evaluating Ethical Resilience and Multiethnic Culinary Innovation in Indonesian School Food Systems**” for consideration in *Food Ethics*.

This manuscript examines gastrocolonialism as an ethical problem within everyday institutional settings, focusing on school canteens in the multiethnic context of West Kalimantan, Indonesia. Drawing on a qualitative case study involving students, teachers, canteen managers, and cultural activists, the article analyses how globalised food systems shape taste, identity, health, and cultural value formation through what we conceptualise as a hidden curriculum of food. At the same time, the study documents how multiethnic traditional cuisines such as Dayak, Malay, Chinese, and Madurese, function as forms of ethical resistance, cultural resilience, and food sovereignty.

The central ethical contribution of this article lies in its demonstration that food choices in schools are not merely nutritional or economic decisions, but normative practices that transmit values related to modernity, prestige, cultural worth, and identity. By situating school canteens as ethical and pedagogical spaces, the study extends debates in food ethics concerning power, justice, and sovereignty into the domain of everyday educational institutions. The article further contributes to ethical discourse by showing how local food practices actively negotiate, rather than passively succumb to, global food hegemony.

We confirm that this manuscript is original, has not been published previously, and is not under consideration elsewhere. All authors have approved the manuscript and agree to its submission to *Food Ethics*.

Thank you for considering our submission. We would be honoured to contribute to the scholarly dialogue fostered by *Food Ethics*, and we look forward to your response.

Sincerely,

Warm Regards

Emi Tipuk Lestari (Corresponding author on behalf of all authors)
